# Supplementary material for: Increased Adiposity Enhances the Accumulation of MDSCs in the Tumor Microenvironment and Adipose Tissue of Pancreatic Tumor-Bearing Mice and in Immune Organs of Tumor-Free Hosts
Source: PubMed Central journal article supplement (PMC6950402; doi:10.3390/nu11123012), 2019-12-10

**Supplemental Table 1. Diet Formulations**

| Class description                                    | Ingredient (grams)  | 30%<br>calorie<br>restricted<br>diet | 10% Kcal<br>from fat<br>diet | 60%<br>Kcal<br>from fat<br>diet |
|------------------------------------------------------|---------------------|--------------------------------------|------------------------------|---------------------------------|
| Protein                                              | Casein, 80 Mesh     | 200                                  | 200                          | 200                             |
| Protein                                              | L-Cystine           | 3                                    | 3                            | 3                               |
| Carbohydrate                                         | Corn Starch         | 197.9                                | 315                          | 0                               |
| Carbohydrate                                         | Maltodextrin 10     | 0 g                                  | 35                           | 125                             |
| Carbohydrate                                         | Sucrose             | 197.9                                | 350                          | 68.8                            |
| Fiber                                                | Cellulose           | 50                                   | 50                           | 50                              |
| Fat                                                  | Soybean Oil         | 25                                   | 25                           | 25                              |
| Fat                                                  | Lard                | 20                                   | 20                           | 245                             |
| Mineral                                              | RD96 Mineral Mix    | 10                                   | 10                           | 10                              |
| Mineral                                              | Dicalcium Phosphate | 13                                   | 13                           | 13                              |
| Mineral                                              | Calcium Carbonate   | 5.5                                  | 5.5                          | 5.5                             |
| Mineral                                              | Potassium Citrate   | 16.5                                 | 16.5                         | 16.5                            |
| Vitamin                                              | Choline Bitartrate  | 2                                    | 2                            | 2                               |
| Vitamin                                              | AIN-76A vitamin mix | 10                                   | 10                           | 10                              |
| Dye                                                  | Yellow FD&C #5      | 0                                    | 0.05                         | 0                               |
| Dye                                                  | Blue FD&C #1        | 0                                    | 0                            | 0.05                            |
|                                                      | Total:              | 750.8                                | 1055.05 g                    | 773.85                          |
| <b>Caloric Information Physiological Fuel Values</b> |                     |                                      |                              |                                 |
| Protein (kcal)                                       |                     | 29%                                  | 20%                          | 20%                             |
| Fat (kcal)                                           |                     | 14%                                  | 10%                          | 60%                             |
| Carbohydrate (kcal)                                  |                     | 57%                                  | 70%                          | 20%                             |
| Energy Density (kcal/gm)                             |                     | 3.78                                 | 3.85                         | 5.24                            |

**Supplemental Table 2. List of antibodies for flow cytometry.**

| <b>Antibody</b> | <b>Clone</b> | <b>Fluorochrome</b> | <b>Catalog number</b> | <b>Supplier</b> |
|-----------------|--------------|---------------------|-----------------------|-----------------|
| CD3 $\epsilon$  | 145-2C11     | FITC, APC-Cy7       | 553062, 557596        | BD Biosciences  |
| CD4             | GK1.5        | PE                  | 553730                | BD Biosciences  |
| CD8 $\alpha$    | 53-6.7       | APC                 | 553035                | BD Biosciences  |
| CD11b           | M1/70        | APC-Cy7             | 557657                | BD Biosciences  |
| CD11c           | HL3          | PE                  | 553802                | BD Biosciences  |
| CD19            | 1D3          | FITC                | 553785                | BD Biosciences  |
| CD161 (NK1.1)   | PK136        | PE                  | 557391                | BD Biosciences  |
| F4/80           | BM8          | APC                 | 17-4801-82            | eBiosciences    |
| Fc block        | 93           | X                   | 101302                | Biolegend       |
| Gr-1            | RB6-8C5      | FITC                | 553127                | BD Biosciences  |
| I-Ab            | AF6-120.1    | FITC                | 553551                | BD Biosciences  |
| Ly6C            | 1A8          | APC                 | 560599                | BD Biosciences  |
| Ly6G            | AL-21        | APC-Cy7             | 560596                | BD Biosciences  |

**Supplemental Table 3. Effect of increased adiposity on splenic immune cell distribution**

| <b>A Splenic immune cells (percent)</b>                 | Lean (n=12) | Overwt (n=14) | Obese (n=10)            | p-value |
|---------------------------------------------------------|-------------|---------------|-------------------------|---------|
| B cells (CD19 <sup>+</sup> )                            | 45.7 ± 8.8  | 41.6 ± 9.2    | 43.4 ± 7.4              | 0.487   |
| Total T cells (CD3 <sup>+</sup> )                       | 28.7 ± 10.0 | 22.9 ± 7.4    | 18.1 ± 5.2 <sup>a</sup> | 0.011   |
| Helper T cells (CD3 <sup>+</sup> CD4 <sup>+</sup> )     | 17.6 ± 6.3  | 13.4 ± 5.0    | 11.5 ± 5.8 <sup>a</sup> | 0.028   |
| Cytotoxic T cells (CD3 <sup>+</sup> CD8 <sup>+</sup> )  | 12.9 ± 5.0  | 11.2 ± 3.8    | 9.2 ± 3.2               | 0.121   |
| NK cells (NK1.1 <sup>+</sup> )                          | 7.8 ± 3.3   | 6.5 ± 3.9     | 8.7 ± 4.8               | 0.529   |
| Dendritic Cells (I-Ab <sup>+</sup> CD11c <sup>+</sup> ) | 10.8 ± 4.2  | 11.1 ± 4.9    | 10.6 ± 3.6              | 0.988   |
| Macrophages (I-Ab <sup>+</sup> CD11b <sup>+</sup> )     | 12.5 ± 4.0  | 14.9 ± 3.9    | 15.0 ± 2.6              | 0.169   |
| MDSCs (Gr-1 <sup>+</sup> CD11b <sup>+</sup> )           | 13.1 ± 7.7  | 17.5 ± 9.3    | 21.7 ± 11.1             | 0.084   |
| gMDSCs (Gr-1 <sup>hi</sup> CD11b <sup>+</sup> )         | 8.2 ± 6.3   | 10.2 ± 6.0    | 15.1 ± 10.4             | 0.086   |
| mMDSCs (Gr-1 <sup>lo</sup> CD11b <sup>+</sup> )         | 4.4 ± 2.3   | 6.6 ± 4.4     | 6.0 ± 2.1               | 0.128   |

| <b>B Splenic immune cells (x10<sup>6</sup>)</b>         | Lean (n=12)  | Overwt (n=14) | Obese (n=10) | p-value |
|---------------------------------------------------------|--------------|---------------|--------------|---------|
| Splenocyte count                                        | 143.5 ± 68.6 | 177.4 ± 109.0 | 189.5 ± 50.2 | 0.381   |
| B cells (CD19 <sup>+</sup> )                            | 69.1 ± 35.5  | 68.1 ± 32.7   | 82.4 ± 23.9  | 0.506   |
| Total T cells (CD3 <sup>+</sup> )                       | 37.1 ± 14.5  | 35.2 ± 17.4   | 33.9 ± 12.6  | 0.876   |
| Helper T cells (CD3 <sup>+</sup> CD4 <sup>+</sup> )     | 24.0 ± 10.1  | 21.4 ± 12.4   | 22.2 ± 13.2  | 0.853   |
| Cytotoxic T cells (CD3 <sup>+</sup> CD8 <sup>+</sup> )  | 17.5 ± 7.5   | 18.0 ± 11.0   | 17.8 ± 8.9   | 0.991   |
| NK cells (NK1.1 <sup>+</sup> )                          | 10.8 ± 7.2   | 9.5 ± 6.5     | 16.3 ± 11.3  | 0.136   |
| Dendritic Cells (I-Ab <sup>+</sup> CD11c <sup>+</sup> ) | 15.6 ± 10.8  | 17.8 ± 11.0   | 20.7 ± 10.5  | 0.415   |
| Macrophages (I-Ab <sup>+</sup> CD11b <sup>+</sup> )     | 17.9 ± 10.9  | 25.7 ± 13.8   | 28.5 ± 9.7   | 0.092   |
| MDSCs (Gr-1 <sup>+</sup> CD11b <sup>+</sup> )           | 21.4 ± 18.1  | 35.0 ± 32.5   | 39.4 ± 17.6  | 0.112   |
| gMDSCs (Gr-1 <sup>hi</sup> CD11b <sup>+</sup> )         | 13.7 ± 12.5  | 21.2 ± 20.6   | 26.4 ± 13.3  | 0.102   |
| mMDSCs (Gr-1 <sup>lo</sup> CD11b <sup>+</sup> )         | 6.9 ± 6.4    | 12.6 ± 12.0   | 11.7 ± 5.9   | 0.169   |

a = significantly different than Lean (p<0.05)

b = significantly different than Overwt (p<0.05)

**Supplemental Table 4. Effect of increased adiposity on TDLN immune cell distribution**

| <b>A TDLN immune cells (percent)</b>                    | <b>Lean (n=8)</b> | <b>Overwt (n=8)</b>     | <b>Obese (n=8)</b>        | <b>p-value</b> |
|---------------------------------------------------------|-------------------|-------------------------|---------------------------|----------------|
| B cells (CD19 <sup>+</sup> )                            | 33.8 ± 2.7        | 35.1 ± 2.5              | 35.7 ± 1.7                | 0.298          |
| Total T cells (CD3 <sup>+</sup> )                       | 56.7 ± 1.2        | 48.3 ± 2.0 <sup>a</sup> | 45.7 ± 1.3 <sup>a,b</sup> | <0.001         |
| Helper T cells (CD3 <sup>+</sup> CD4 <sup>+</sup> )     | 35.7 ± 0.9        | 28.0 ± 2.3 <sup>a</sup> | 26.4 ± 1.4 <sup>a</sup>   | <0.001         |
| Cytotoxic T cells (CD3 <sup>+</sup> CD8 <sup>+</sup> )  | 19.4 ± 1.3        | 15.8 ± 1.1 <sup>a</sup> | 13.8 ± 1.3 <sup>a,b</sup> | <0.001         |
| Dendritic Cells (I-Ab <sup>+</sup> CD11c <sup>+</sup> ) | 0.6 ± 0.1         | 0.7 ± 0.1               | 0.7 ± 0.1                 | 0.433          |
| Macrophages (I-Ab <sup>+</sup> CD11b <sup>+</sup> )     | 1.1 ± 0.3         | 1.5 ± 0.4               | 2.2 ± 0.6 <sup>a,b</sup>  | <0.001         |
| MDSCs (Gr-1 <sup>+</sup> CD11b <sup>+</sup> )           | 2.2 ± 0.4         | 4.5 ± 0.5 <sup>a</sup>  | 6.3 ± 0.7 <sup>a,b</sup>  | <0.001         |
| gMDSCs (Gr-1 <sup>hi</sup> CD11b <sup>+</sup> )         | 1.2 ± 0.2         | 2.0 ± 0.3 <sup>a</sup>  | 2.4 ± 0.4 <sup>a</sup>    | <0.001         |
| mMDSCs (Gr-1 <sup>lo</sup> CD11b <sup>+</sup> )         | 1.1 ± 0.3         | 2.6 ± 0.5 <sup>a</sup>  | 3.6 ± 0.6 <sup>a,b</sup>  | <0.001         |

| <b>B TDLN immune cells (x10<sup>6</sup>)</b>            | <b>Lean (n=8)</b> | <b>Overwt (n=8)</b>    | <b>Obese (n=8)</b>       | <b>p-value</b> |
|---------------------------------------------------------|-------------------|------------------------|--------------------------|----------------|
| B cells (CD19 <sup>+</sup> )                            | 3.7 ± 0.6         | 4.2 ± 0.4              | 4.3 ± 0.3 <sup>a</sup>   | 0.039          |
| Total T cells (CD3 <sup>+</sup> )                       | 6.3 ± 0.8         | 5.8 ± 0.8              | 5.6 ± 0.5                | 0.125          |
| Helper T cells (CD3 <sup>+</sup> CD4 <sup>+</sup> )     | 4.0 ± 0.5         | 3.3 ± 0.6 <sup>a</sup> | 3.2 ± 0.4 <sup>a</sup>   | 0.014          |
| Cytotoxic T cells (CD3 <sup>+</sup> CD8 <sup>+</sup> )  | 2.2 ± 0.3         | 1.9 ± 0.3              | 1.7 ± 0.3 <sup>a</sup>   | 0.014          |
| Dendritic Cells (I-Ab <sup>+</sup> CD11c <sup>+</sup> ) | 0.1 ± 0.1         | 0.1 ± 0.1              | 0.1 ± 0.1                | 0.153          |
| Macrophages (I-Ab <sup>+</sup> CD11b <sup>+</sup> )     | 0.1 ± 0.1         | 0.2 ± 0.1              | 0.3 ± 0.1 <sup>a,b</sup> | <0.001         |
| MDSCs (Gr-1 <sup>+</sup> CD11b <sup>+</sup> )           | 0.2 ± 0.1         | 0.5 ± 0.1 <sup>a</sup> | 0.8 ± 0.1 <sup>a,b</sup> | <0.001         |
| gMDSCs (Gr-1 <sup>hi</sup> CD11b <sup>+</sup> )         | 0.1 ± 0.1         | 0.2 ± 0.1 <sup>a</sup> | 0.3 ± 0.1 <sup>a,b</sup> | <0.001         |
| mMDSCs (Gr-1 <sup>lo</sup> CD11b <sup>+</sup> )         | 0.1 ± 0.1         | 0.3 ± 0.1              | 0.5 ± 0.1 <sup>a</sup>   | <0.001         |

a = significantly different than Lean (p<0.05)

b = significantly different than Overwt (p<0.05)

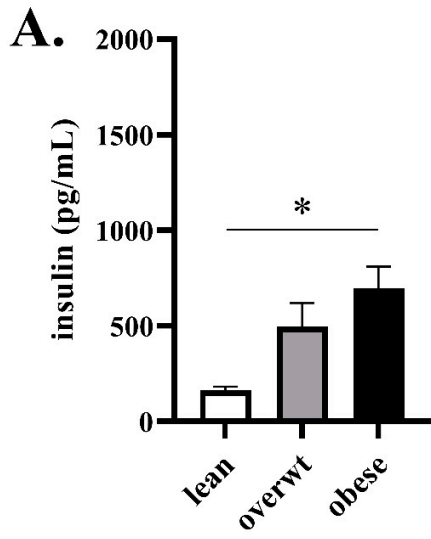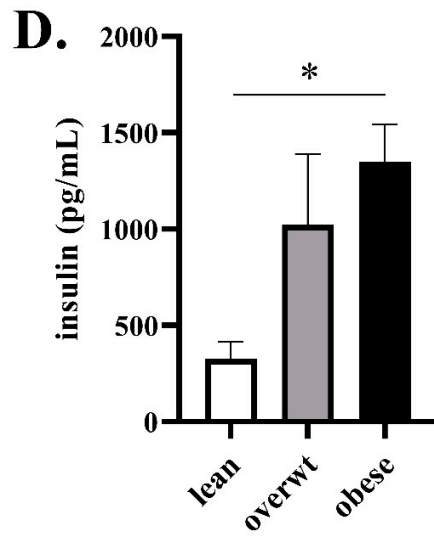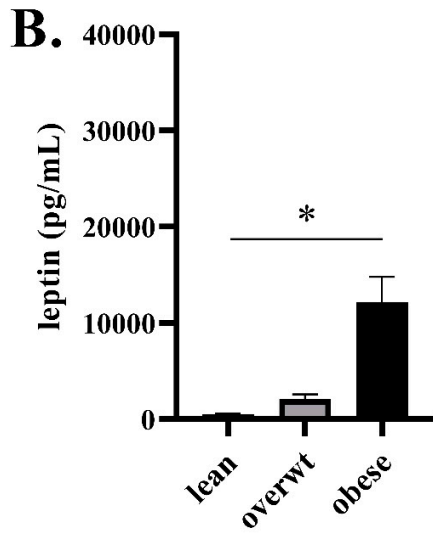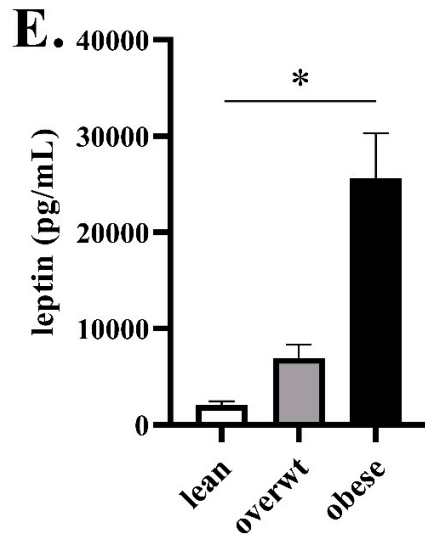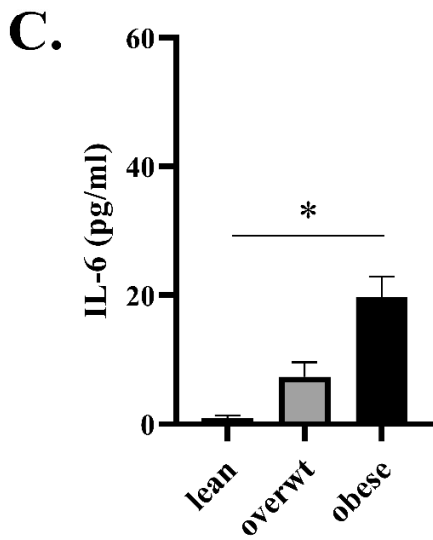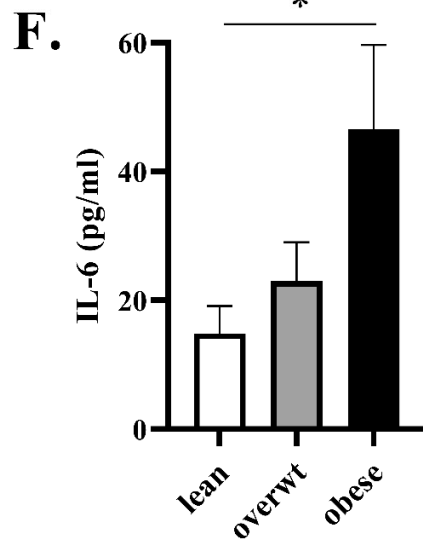

Supplement: nutrients-11-03012-s001.pdf [file nutrients-11-03012-s001.pdf]
